# Supplementary material for: Using Computer Vision Techniques to Automatically Detect Abnormalities in Chest X-rays
Source: MDPI journal article supplement (doi:10.3390/diagnostics13182979), 2023-09-18
Supplement: s1 [file s1]

### Supplementary Materials S1

When it comes to spotting anomalies in chest X-ray images, the YOLO v8 algorithm has proven to perform better than other object detection algorithms; such as faster regions with convolutional neural networks (Faster R-CNNs), RetinaNet, and single shot detectors (SSDs) [5]. A total of 500 testing and 5000 training images were used in a study using four distinct algorithms [3].

The YOLO v8 algorithm outperformed all three algorithms, achieving a mean average perfect graph of 0.83 at a threshold of 0.5. [44] Additionally, with 0.88 and 0.93 perceptivity and specificity scores, YOLO v8 outperformed the other algorithms. This shows that YOLO v8 performs better at identifying anomalies in chest X-ray images and contrasting them with their typical features [48].

### Supplementary Materials S2

**Table S1.** A complete summary.

| <b>Abnormality</b> | <b>Training Set</b> | <b>Testing Set</b> |
|--------------------|---------------------|--------------------|
| Pneumonia [7]      | 3981                | 1019               |
| Atelectasis [12]   | 4786                | 1214               |
| Consolidation [10] | 3655                | 931                |
| Total              | 12,422              | 3164               |
